# Supplementary material for: Estimating fractional cover of saltmarsh vegetation species in coastal wetlands in the Yellow River Delta, China using ensemble learning model
Source: Frontiers journal article supplement (doi:10.3389/fmars.2022.1077907), 2022-12-21
Supplement: Data_Sheet_1.docx [file Data_Sheet_1.docx]

**[Supplementary Materials for]**

**Estimating fractional cover of saltmarsh vegetation species in coastal wetlands in the Yellow River Delta, China using ensemble learning model**

Zhanpeng Wang1,2, Yinghai Ke1*, Dan Lu2, Zhaojun Zhuo1, Qingqing Zhou1, Yue Han1, Peiyu Sun1, Zhaoning Gong1, Demin Zhou1

1College of Resource Environment and Tourism, Capital Normal University, Beijing, 100048, China;

2School of Resource and Environmental Sciences, Wuhan University, Wuhan , 430079, China

**Corresponding Author:** Yinghai Ke, Ph. D, [yke@cnu.edu.cn](mailto:yke@cnu.edu.cn)

**Contents of this file**

Figure S1

| 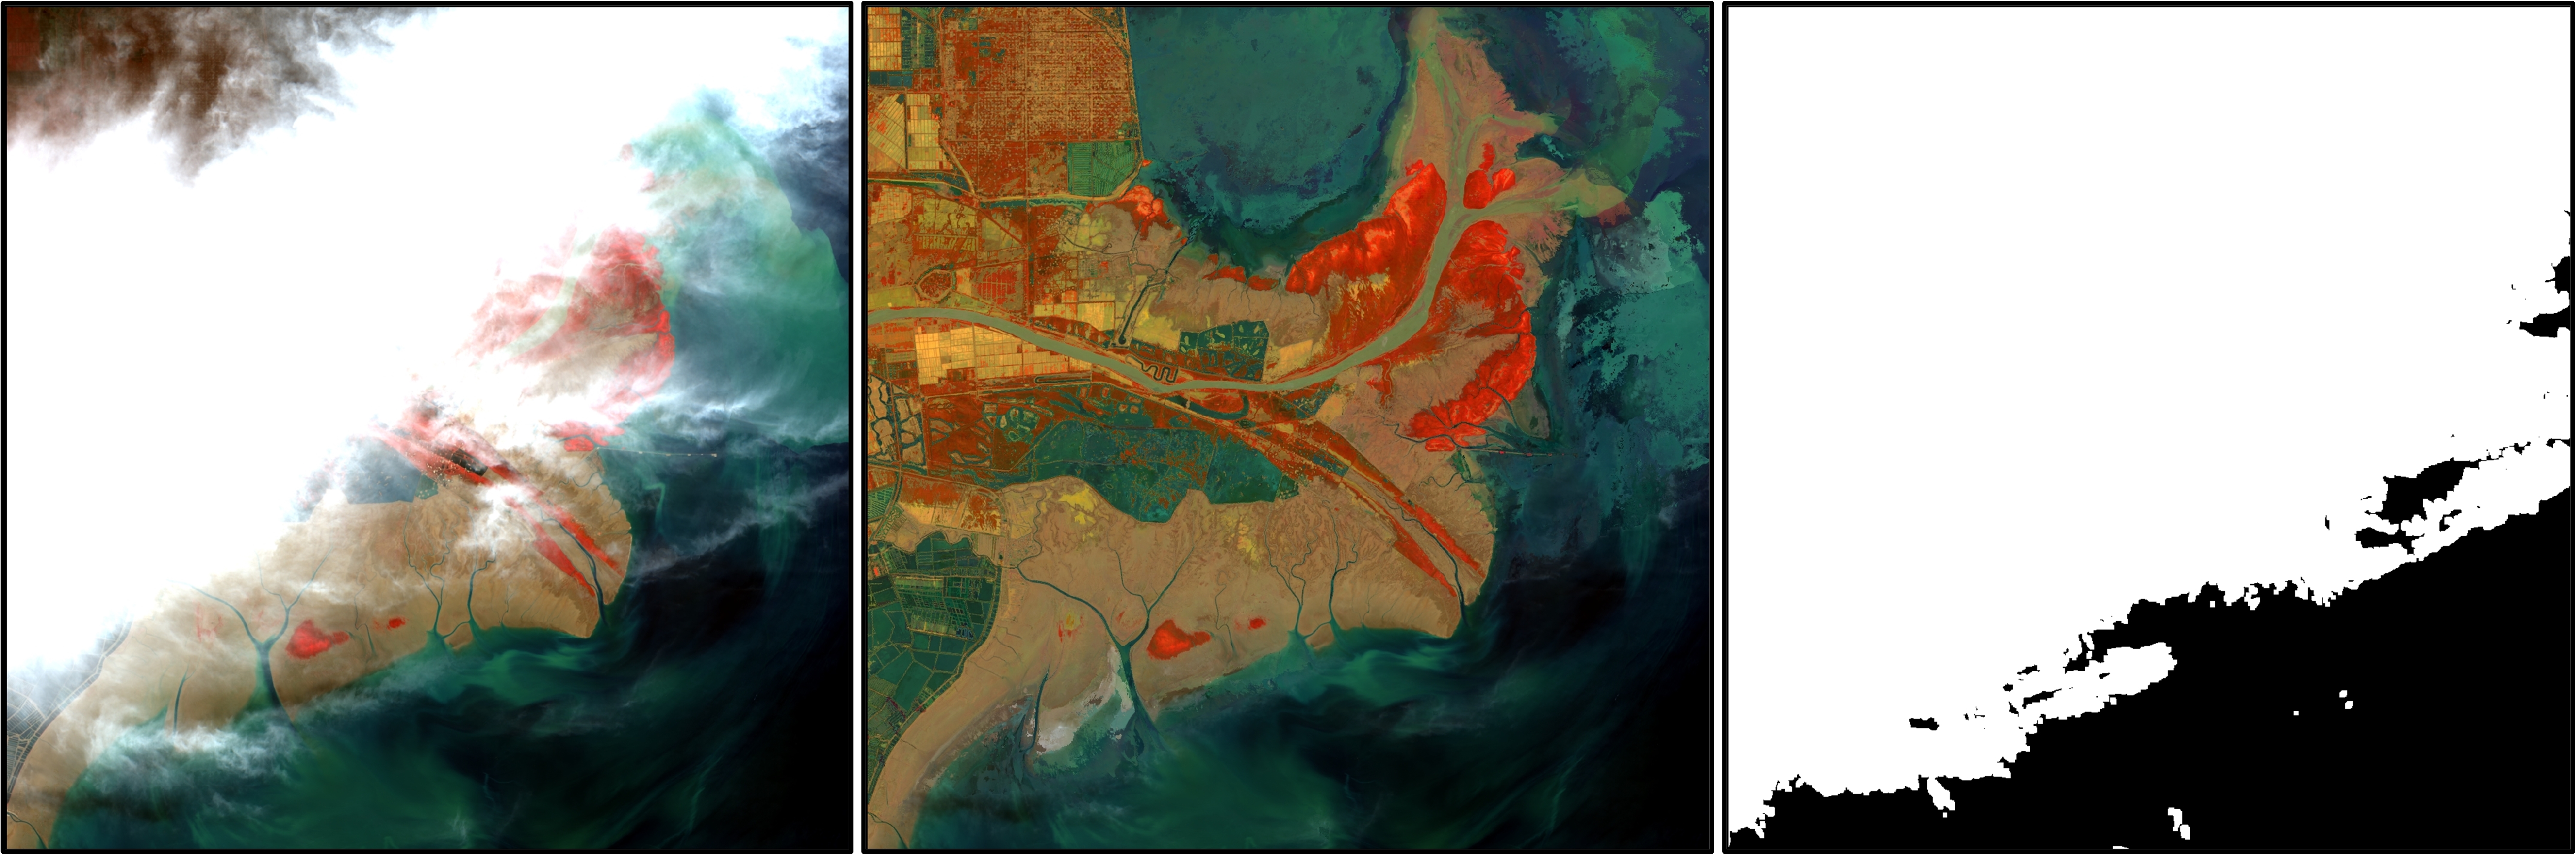 |
| --- |
| 1. (B) (C) |

Figure S1. (A) Original Landsat 8 OLI image and (B) cloud removal image in standard false color composition, and (C) the cloud mask image obtained by Landsat quality assessment band in October 8, 2020.
